# Supplementary material for: A follow-up study shows that recovered patients with re-positive PCR test in Wuhan may not be infectious
Source: BMC Med. 2021 Mar 15;19:77. doi: 10.1186/s12916-021-01954-1 (PMC7956402; doi:10.1186/s12916-021-01954-1)
Supplement: Supplementary file 2 — Additional file 2. [file 12916_2021_1954_MOESM2_ESM.xlsx]

## Sheet: Sheet1
Kit	Company	Product Name	NMPA Registration NO.
1	Maccura Biotechnology Co., Ltd	SARS-CoV-2 Fluorescent PCR Kit (for the COVID-19 Coronavirus)	20203400184
2	DA An Gene Co., Ltd. of Sun Yat-sen University	Detection Kit for 2019 Novel Coronavirus(2019-nCoV)RNA(PCR-Fluorescence Probing)	20203400063
3	Wuhan EasyDiagnosis Biomedicine Co., Ltd	COVID-19 (SARS-CoV-2) Nucleic Acid Test Kit	20203400212
4	BGI Genomics Co., Ltd.	Real-Time Fluorescent RTPCR Kit for Detecting SARSCoV-2	20203400060
5	Shanghai ZJ Bio-Tech Co.,Ltd.	Novel Coronavirus (2019-nCoV) Real Time Multiplex RT-PCR Kit	20203400057
6	Shanghai Fosun Long March Medical Science Co., Ltd	Novel Coronavirus (2019-nCoV) RT-PCR Detection Kit	20203400299
NMPA: National Medical Products Administration (China)
